# Supplementary material for: Getting it wrong most of the time? Comparing trialists’ choice of primary outcome with what patients and health professionals want
Source: Springer Nature journal article supplement (doi:10.1186/s13063-022-06348-z), 2022-06-27
Supplement: MOESM2 [file 23210882]

Trial outcomes: are the trial outcomes used in breast cancer research providing relevant information to support decision-making?

### Article 1

A trial is testing the effects of a treatment with ribociclib (chemotherapy drug) plus letrozole (hormone therapy) compared to placebo plus letrozole as first-line treatment in postmenopausal women with positive hormone receptor (HR) and negative human epidermal growth factor receptor 2 (HER2). HR and HER2 influence the growth of the breast cancer cells.

*If you were involved in a decision about the treatment above described, what would be the 5 most important things you would like to see measured in the trial (where 1 is the most important, 2 the next most important etc)? You do not need to choose 5 things if you don't want to.*

|                                                                                                  | 1                     | 2                     | 3                     | 4                     | 5                     |
|--------------------------------------------------------------------------------------------------|-----------------------|-----------------------|-----------------------|-----------------------|-----------------------|
| <b>Safety.</b>                                                                                   | <input type="radio"/> | <input type="radio"/> | <input type="radio"/> | <input type="radio"/> | <input type="radio"/> |
| <b>Overall survival.</b>                                                                         | <input type="radio"/> | <input type="radio"/> | <input type="radio"/> | <input type="radio"/> | <input type="radio"/> |
| <b>Overall response rate</b><br>(complete or partial response).                                  | <input type="radio"/> | <input type="radio"/> | <input type="radio"/> | <input type="radio"/> | <input type="radio"/> |
| <b>Locally investigator-assessed progression-free survival.</b>                                  | <input type="radio"/> | <input type="radio"/> | <input type="radio"/> | <input type="radio"/> | <input type="radio"/> |
| <b>Clinical benefit rate</b><br>(overall response plus stable disease lasting 24 weeks or more). | <input type="radio"/> | <input type="radio"/> | <input type="radio"/> | <input type="radio"/> | <input type="radio"/> |
| <b>Quality-of-life assessments.</b>                                                              | <input type="radio"/> | <input type="radio"/> | <input type="radio"/> | <input type="radio"/> | <input type="radio"/> |

Please add and rank any other outcome that you think should have been measured but are not on the list.

Example: "My important outcome - rank 3"

Please share any comments you have.

Trial outcomes: are the trial outcomes used in breast cancer research providing relevant information to support decision-making?

## Article 2

A trial is testing the clinical use of 70-gene signature test\* compared with the standard clinical–pathological criteria in selecting patients for adjuvant chemotherapy.

\*70-gene signature test is a genomic test developed to better predict clinical outcome and to determine whether the addition of adjuvant chemotherapy to endocrine therapy is worthwhile.

*If you were involved in a decision about the use of the genomic test above described, what would be the 5 most important things you would like to see measured in the trial (where 1 is the most important, 2 the next most important etc)? You do not need to choose 5 things if you do not want to.*

|                                                                                                                                                               | 1                     | 2                     | 3                     | 4                     | 5                     |
|---------------------------------------------------------------------------------------------------------------------------------------------------------------|-----------------------|-----------------------|-----------------------|-----------------------|-----------------------|
| <b>Overall survival</b> (time from trial randomisation until death from any cause).                                                                           | <input type="radio"/> | <input type="radio"/> | <input type="radio"/> | <input type="radio"/> | <input type="radio"/> |
| <b>Survival without distant metastasis at 5 years</b> (time from trial randomisation until the first distant metastatic recurrence, or death from any cause). | <input type="radio"/> | <input type="radio"/> | <input type="radio"/> | <input type="radio"/> | <input type="radio"/> |
| <b>Disease-free survival</b> (time from trial randomisation until first disease progression or death from any cause).                                         | <input type="radio"/> | <input type="radio"/> | <input type="radio"/> | <input type="radio"/> | <input type="radio"/> |
| <b>Proportion of patients who received chemotherapy based on the clinical risk as compared with the genomic risk.</b>                                         | <input type="radio"/> | <input type="radio"/> | <input type="radio"/> | <input type="radio"/> | <input type="radio"/> |

Please add and rank any other outcome that you think should have been measured but are not on the list.

Example: "My important outcome - rank 3"

Please share any comments you have.
